# Supplementary material for: Adsorbed water for the electro-oxidation of methanol at Pt–Ru alloyElectronic supplementary information (ESI) available: additional explanation for Figs. 2 and 3. See http://www.rsc.org/suppdata/cc/b2/b212197b/
Source: Royal Society of Chemistry journal article supplement (doi:10.1039/b212197b), 2003-03-05
Supplement: b212197b.doc [file b212197b.doc]

# Supporting information

Adsorbed water for the electro-oxidtaion of methanol at Pt-Ru alloy

Takahiro Yajima,*a* Noriaki Wakabayashi,*b* Hiroyuki Uchida,*a* and Masahiro Watanabe*b**

a Graduate School of Engineering, b Clean Energy Research Center, University of Yamanashi,

Takeda 4, Kofu 400-8510, Japan. Fax: +81-55-254-0371; Tel: +81-55-220-8620;

E-mail: [mwatanab@ab11.yamanashi.ac.jp](mailto:mwatanab@ab11.yamanashi.ac.jp)

**Additional explanation for Figs. 2 and 3**

It is seen in Fig. 3 in our paper that the band intensities of COL and **(HOH) decrease gradually as the potential is increased up to 400 mV in spite of negligible anodic current. However, we consider that such changes were ascribed to some artifacts yielded by background subtraction.

For the oxidation of the pre-adsorbed CO at the same Pt-Ru electrode, as shown in figure illustration below, the band intensities of **(OH), **(HOH) and COL are almost unchanged at less positive potential than 400 mV and decrease together steeplyat about 400 mV. In this case, because the adsorbed species are only CO and water, the baseline of the IR spectrum was clear, enabling precise evaluation of the band intensities. However, in Fig. 2 in our paper for the methanol oxidation reaction (MOR) in our paper, it is difficult to evaluate the intensity of weak band of **(HOH) accurately, due to an overlap of bands assigned to intermediate species such as -COOH, COO-, or -CHO. Therefore, the small decrease in the intensity of **(HOH) is probably due to artifacts yielded by background subtraction.

Potential dependence of the normalized IR-band intensity of adsorbed species obtained from ATR-IRA spectra for the oxidation of the pre-adsorbed CO, which were acquired with the LSV (dashed curve; cited from C in Fig. 1 in our paper). () COL; () H2Oad, **(OH); () H2Oad, **(HOH). Potential sweep rate was 20 mV s-1. The spectrum obtained at 975 mV was taken as a reference.

We think that our calculation of the intensity of the COL band includes an error to some extent by the following reason. In the MOR, the COL still remained at the surface at the reference potential of 975 mV. The peak wavenumber of the COL shifts from 2020 to 2040 cm-1 with increasing potential from 100 to 400 mV and is almost constant at *E* > 400 mV. By subtracting the reference spectrum, the bipolar band shape appreciably changes between 100 and 400 mV, which affects the calculation of the peak-to-peak intensity. As shown in the illustration of this file, the intensity of the COL was almost constant up to 400 mV in the case of the oxidation of the pre-adsorbed CO (COL is completely removed at the reference potential).

**The most important point in the MOR and the oxidation of the pre-adsorbed CO at Pt-Ru electrode is that the band intensities of both COL and adsorbed water commence to decrease together steeply at about 400 mV.**
